# Supplementary material
Source: MDPI journal article supplement (https://www.mdpi.com/2076-3417/13/20/11381)
Supplement: s1 [file s1]

**Table1: Simulated Altitude Protocols and Physiological Effects**

| Hypoxia High Intensity Interval Training (HHIT) |                    |                             |                                                                                      |                |                                                                                                                                           |                                                                                                    |                                                                                                                                                                                                                                                                                                                                                                    |                                                                        |                      |
|-------------------------------------------------|--------------------|-----------------------------|--------------------------------------------------------------------------------------|----------------|-------------------------------------------------------------------------------------------------------------------------------------------|----------------------------------------------------------------------------------------------------|--------------------------------------------------------------------------------------------------------------------------------------------------------------------------------------------------------------------------------------------------------------------------------------------------------------------------------------------------------------------|------------------------------------------------------------------------|----------------------|
|                                                 | Simulated altitude | Hypoxia (FiO <sub>2</sub> ) | Intensity                                                                            | Duration       | Vo <sub>2</sub> max (mL.kg <sup>-1</sup> .min <sup>-1</sup> )                                                                             | Anaerobic performance                                                                              | Physiology effects                                                                                                                                                                                                                                                                                                                                                 | Participants                                                           | Authors              |
| 1                                               | ≈ 2,500-2,600m     | 15.2%                       | <ul style="list-style-type: none"> <li>intensity 95% WR<sub>LT</sub></li> </ul>      | 3 WKS          | ↑67.8 -> 70.5, 3.98%*                                                                                                                     | <ul style="list-style-type: none"> <li>↑average generated power</li> <li>↑average speed</li> </ul> | <ul style="list-style-type: none"> <li>↑VO<sub>2</sub>LT, ↑MCV</li> <li>↑WR<sub>max</sub>, ↑WRLT, ↑ΔLA</li> <li>No effect on hematological variables: RBC, HGB, HCT</li> </ul>                                                                                                                                                                                     | well-trained cyclists, 20 males elite cyclists,                        | Czuba et al., [1]    |
| 2                                               | ≈2500m             |                             | <ul style="list-style-type: none"> <li>HHIT, 3 sessions/week</li> </ul>              | 3 WKS          | ↑52.6 ->56.7, 7.8%                                                                                                                        |                                                                                                    | <ul style="list-style-type: none"> <li>↑WR<sub>max</sub>, absolute (4.5%) and relative (6.2%)</li> <li>↓ΔLA</li> <li>No effect in hematological variables in hypoxic</li> </ul>                                                                                                                                                                                    | well trained basketball players 20 males                               | Czuba et al., [29]   |
| 3                                               | ≈3000m             | 14.6%                       | <ul style="list-style-type: none"> <li>8 cycling repeated sprint interval</li> </ul> | 4 WKS /12times | ↑59.3 -> 62.9 6.1 %                                                                                                                       | ↑average power                                                                                     | <ul style="list-style-type: none"> <li>↑RSH</li> <li>↑mRNA concentrations of HIF-1α (+55%),</li> <li>↑carbonic anhydrase III* (+35%)</li> <li>↑monocarboxylate transporter-4 (+20%)</li> <li>molecular adaptations</li> <li>larger blood perfusion variations in active muscles</li> <li>changes in hemoglobin variations during sprints throughout RSA</li> </ul> | trained male cyclists, 50 moderately                                   | Faiss et al., [19]   |
| 4                                               | ≈2500m             | 15.3%                       | <ul style="list-style-type: none"> <li>3 high-intensity training sessions</li> </ul> | 5 WKS          | <ul style="list-style-type: none"> <li>↑0.11±0.18 l/min, 4.2 ±7.0%</li> <li>No effect in normoxia 0.16 ± 0.23 l/min, 6.4 ±8.1%</li> </ul> | <ul style="list-style-type: none"> <li>↑power output</li> <li>↑swimming velocity</li> </ul>        |                                                                                                                                                                                                                                                                                                                                                                    | Sixteen well-trained collegiate and Masters swimmers (10 women, 6 men) | Truijens et al.,[31] |

|   |         |       |                                                                                                                                                                                                                                                                                                                                                                                                                                                                 |                                                                       |                                                                                                                                 |                                                                                                                                                                                                                                                                    |                                                                                                                                                                                                                                                                                                  |                                                                                              |                       |
|---|---------|-------|-----------------------------------------------------------------------------------------------------------------------------------------------------------------------------------------------------------------------------------------------------------------------------------------------------------------------------------------------------------------------------------------------------------------------------------------------------------------|-----------------------------------------------------------------------|---------------------------------------------------------------------------------------------------------------------------------|--------------------------------------------------------------------------------------------------------------------------------------------------------------------------------------------------------------------------------------------------------------------|--------------------------------------------------------------------------------------------------------------------------------------------------------------------------------------------------------------------------------------------------------------------------------------------------|----------------------------------------------------------------------------------------------|-----------------------|
| 5 | ≈3,000m |       | <ul style="list-style-type: none"><li>The interval training in: consisted of 6 – 8 reps of 2–3 min duration at 100% PPO during the first 4 wk</li><li>increased to 5 reps of 5– 6 min at 90% of PPO, then 4 reps of 8 min at 90% of PPO in the last week of training</li><li>IHT: hypoxic training conditions</li><li>IHIT: performed the warm-up, the cool-down, and the recovery from each interval in hypoxia, high-intensity exercise in normoxia</li></ul> | <ul style="list-style-type: none"><li>7-wk training program</li></ul> | <ul style="list-style-type: none"><li>↑IHIT : VO<sub>2</sub>max (L·min<sup>-1</sup>) (8.7 ± 9.1%; <i>P</i> &lt; 0.05)</li></ul> | <ul style="list-style-type: none"><li>IHT: No statistic effect in V O<sub>2</sub>max 4.62 ± 0.33 -&gt;5.02 ±0.42, 8% <i>P</i> &gt; .05</li><li>NOR : V O<sub>2</sub>max 4.47 ± 0.36 -&gt;4.69 ± 0.29 4%</li></ul>                                                  | Thirty-three well-trained cyclists and triathletes                                                                                                                                                                                                                                               | Roels et al., [30]                                                                           |                       |
| 6 | N/A     | 15.2% | HIIT                                                                                                                                                                                                                                                                                                                                                                                                                                                            | 3 WKS                                                                 | ↑ maximal oxygen uptake                                                                                                         | <ul style="list-style-type: none"><li>↑Serum hypoxia-inducible factor</li><li>↑nitric oxide levels</li><li>↑vascular endothelial growth factor</li><li>↑transforming growth factor-</li><li>No effect on serum baseline angiogenic factors and cytokines</li></ul> | Twelve physically active male subjects                                                                                                                                                                                                                                                           | Żebrowska et al., [32]                                                                       |                       |
| 7 | ≈2,500m | 15%   | <ul style="list-style-type: none"><li>SIT consisted of six WAnT sessions over a 2-week period with 24–48 h between each session</li></ul>                                                                                                                                                                                                                                                                                                                       | 2 WKS recovery; 4–7 repetitions)                                      | ↑V O <sub>2</sub> peak +11.9%                                                                                                   | <ul style="list-style-type: none"><li>↑power at AT and TTE performance</li><li>↑anaerobic threshold +13.3%</li></ul>                                                                                                                                               | <ul style="list-style-type: none"><li>↑TTE improved +32.2%</li><li>↑interleukin-6 (IL-6) +17.4%</li><li>↑AT: anaerobic threshold (mL.kg<sup>-1</sup>.min<sup>-1</sup>) +9.5%</li><li>↑TNF-α +10.8% *</li><li>No between group change occurred in 30s sprint performance or Hb and Hct.</li></ul> | Forty-two untrained, but recreationally active individuals (27 males, 15 females) age 21 ± 1 | Richards et al., [22] |

## Hypoxia Training in Incremental protocol

|    | Simulated altitude | Hypoxia (FiO <sub>2</sub> )                                                                                                                                      | Intensity                                                                                                                                                                                                                                                                                             | Duration | Vo2 max (mL.kg <sup>-1</sup> .min <sup>-1</sup> ) | Anaerobic performance                                                                                                                     | Physiology effects                                                                                                                                    | Participants                                                | Authors                 |
|----|--------------------|------------------------------------------------------------------------------------------------------------------------------------------------------------------|-------------------------------------------------------------------------------------------------------------------------------------------------------------------------------------------------------------------------------------------------------------------------------------------------------|----------|---------------------------------------------------|-------------------------------------------------------------------------------------------------------------------------------------------|-------------------------------------------------------------------------------------------------------------------------------------------------------|-------------------------------------------------------------|-------------------------|
| 8  | ≈2,500 - 3,000 m   | FI <sub>O</sub> <sub>2</sub> 17% on day 1 to 14% on day 10; the SpO <sub>2</sub> value was controlled at 88% on days 1-2, 84% on days 3-4, and 82% on days 5-10. | <ul style="list-style-type: none"> <li>interval training</li> <li>3 times per week</li> <li>4 sets of all-out 30-second sprint intervals</li> </ul>                                                                                                                                                   | 3 WKS    | increased by 3.98%                                | <ul style="list-style-type: none"> <li>↑lactate threshold,</li> <li>↑power output</li> <li>↑average speed</li> </ul>                      | <ul style="list-style-type: none"> <li>no differences in hematological variables</li> </ul>                                                           | trained cyclist                                             | Czuba et al., [1]       |
| 9  |                    | <ul style="list-style-type: none"> <li>D1-5: 12%</li> <li>Days 6 to 10: 11%</li> <li>Days 11 to 15: 10.9%</li> </ul>                                             | <p>The weekly schedule in normoxia</p> <ul style="list-style-type: none"> <li>7-km race, 6 paddling sessions at aerobic threshold,</li> <li>4 interval paddles at race-specific intensities,</li> <li>2 resistance-training sessions</li> </ul>                                                       | 2 WKS    |                                                   | <ul style="list-style-type: none"> <li>6.8% enhancement in peak power*</li> <li>8.3% improvement in mean repeat sprint power *</li> </ul> | <ul style="list-style-type: none"> <li>3.6% increase in hemoglobin concentration</li> </ul>                                                           | 10 sub-elite male short-distance sprint light-boat athletes | Bonetti et al.,[16]     |
| 10 | ≈2,000 m           |                                                                                                                                                                  | <ul style="list-style-type: none"> <li>first phase: consisted of 30 min of low-intensity continuous exercise (e.g., walking) at 60-70% of maximum HR</li> <li>second phase: consisted of eight sets of 2-min high-intensity exercise with 1-min rest between sets at 85-95% of maximum HR.</li> </ul> | 8 WKS    |                                                   |                                                                                                                                           | <ul style="list-style-type: none"> <li>increase in FMD</li> <li>increase in DPA</li> <li>reduce arterial stiffness *</li> <li>reduce baPWV</li> </ul> |                                                             | Nishiwak i et al., [34] |

## Hypoxia Submaximal Exercise training and Combined Training

|  | Simulated altitude | Hypoxia (FiO <sub>2</sub> ) | Intensity | Duration | Vo2 max (mL.kg <sup>-1</sup> .min <sup>-1</sup> ) | Anaerobic performance | Physiology effects | Participants | Authors |
|--|--------------------|-----------------------------|-----------|----------|---------------------------------------------------|-----------------------|--------------------|--------------|---------|
|--|--------------------|-----------------------------|-----------|----------|---------------------------------------------------|-----------------------|--------------------|--------------|---------|

|    |              |                                                                                                                                                                                           |         |                                                   |                                                                                                |                                                                                                                                                                                                                                                                                                                                                                                                                                                                       |                                                                 |                     |
|----|--------------|-------------------------------------------------------------------------------------------------------------------------------------------------------------------------------------------|---------|---------------------------------------------------|------------------------------------------------------------------------------------------------|-----------------------------------------------------------------------------------------------------------------------------------------------------------------------------------------------------------------------------------------------------------------------------------------------------------------------------------------------------------------------------------------------------------------------------------------------------------------------|-----------------------------------------------------------------|---------------------|
| 11 | ≈3,000 m     | submaximal exercise:<br>90 min, 3 days per week<br>for six weeks, ergometer<br>exercise load 80%<br>HRmax                                                                                 | 6 WKS   |                                                   |                                                                                                | <ul style="list-style-type: none"> <li>• ↑maximal oxygen uptake</li> <li>• ↑the hemodynamic function (e.g., oxygen uptake, oxygen pulse, and cardiac output)</li> <li>• ↑ hemodynamic and ANS function</li> <li>• not adversely affect immune function</li> <li>• ↓VO<sub>2</sub></li> </ul>                                                                                                                                                                          | 20 athletes                                                     | Jung et al., [37]   |
| 12 | ≈3,000 m     | submaximal exercise:<br>30 mins endurance<br>exercise, cycle<br>ergometer with HR<br>level corresponding to<br>70% HRmax                                                                  | 30 mins |                                                   | ↑ anaerobic<br>metabolism:<br>oxygen inflow<br>into skeletal<br>muscle tissue                  | <ul style="list-style-type: none"> <li>• lower exercise load with the same RPE</li> <li>• a lower SpO<sub>2</sub>, VO<sub>2</sub>, oxygen pulse, oxhb, and StO<sub>2</sub>, and a higher RER and dxhb during exercise</li> </ul>                                                                                                                                                                                                                                      | 12 healthy men                                                  | Park et al., [15]   |
| 13 | ≈3200m~4400m | Sixteen well-trained athletes completed 90 min of endurance training (60–70% of heart rate reserve), followed by two 30-s all-out sprints (Wingate test), daily, for 10 consecutive days. | 10 days | $V_E 14.5 \pm 16.6$<br><br>$VO_2 - 0.52 \pm 0.52$ | the mean power during the 30-s Wingate test increased by 3.0% 2 days, and 1.7% 9 days post-IHT | <ul style="list-style-type: none"> <li>• oxygen cost –8.0%</li> <li>• During the time trial, the IHT participants' blood lactate concentration, respiratory exchange ratio, and SpO<sub>2</sub>, relative to the placebo group, was substantially increased at 2 days post-intervention.</li> <li>• IHT to the normal training program of well- trained athletes produced worthwhile gains in 30s sprint performance possibly through enhanced glycolysis.</li> </ul> | Sixteen well-trained athletes in variety of cycling backgrounds | Hamlin et al., [21] |
| 14 | ≈3,000 m     | Multi Component:<br>training: Running,<br>Cycling, and Resistance<br>training                                                                                                             | 6 WKS   | ↑54.6 -> 60.1<br>+13.3%                           | peak anaerobic<br>power<br>↑50 m free-style<br>28.2 s -> 27.2 s                                | <ul style="list-style-type: none"> <li>• Muscular function and hormonal response parameters GH, insulin like growth factor-1; IGF-1, and vascular endothelial growth factor, VEGF have interaction effects</li> </ul>                                                                                                                                                                                                                                                 | 20 swimmers<br><br>(10,10)                                      | Park & Lim, [2]     |

|    |          |                                                                                                                                                                                                                                                           |                |                                                                                        |                                                                                     |                                                                                                          |                          |                    |
|----|----------|-----------------------------------------------------------------------------------------------------------------------------------------------------------------------------------------------------------------------------------------------------------|----------------|----------------------------------------------------------------------------------------|-------------------------------------------------------------------------------------|----------------------------------------------------------------------------------------------------------|--------------------------|--------------------|
| 15 | ≈3,000 m | <p>3sessions of sub-intensity (60% VO<sub>2</sub>max) aerobic endurance training;</p> <p>interval training consisted of three sets of 2 intervals at a peak power-output (PPO) intensity of 100% for 2 min,</p> <p>2-min rest state between intervals</p> | 3 WKS sessions | <ul style="list-style-type: none"> <li>No difference in V O<sub>2</sub> max</li> </ul> | <ul style="list-style-type: none"> <li>↑ power output (P<sub>aver</sub>)</li> </ul> | <ul style="list-style-type: none"> <li>↑ PPO in nomoxia 7.2 %</li> <li>↑ PPO in hypoxia 11.3%</li> </ul> | 19 well cycling athletes | Roels et al., [45] |
|----|----------|-----------------------------------------------------------------------------------------------------------------------------------------------------------------------------------------------------------------------------------------------------------|----------------|----------------------------------------------------------------------------------------|-------------------------------------------------------------------------------------|----------------------------------------------------------------------------------------------------------|--------------------------|--------------------|

## Exposure hypoxia environment in Recovery and Sleep state

|    | Simulated altitude | Hypoxia (FiO <sub>2</sub> ) | Intensity                                                                                                                                                                                                                                                                                                                                                                                                                                                                      | Duration                                                                | Vo2 max (mL.kg <sup>-1</sup> .min <sup>-1</sup> )                                                                                | Anaerobic performance | Physiology effects                                                                                                                                                                                                   | Participants                                       | Authors            |
|----|--------------------|-----------------------------|--------------------------------------------------------------------------------------------------------------------------------------------------------------------------------------------------------------------------------------------------------------------------------------------------------------------------------------------------------------------------------------------------------------------------------------------------------------------------------|-------------------------------------------------------------------------|----------------------------------------------------------------------------------------------------------------------------------|-----------------------|----------------------------------------------------------------------------------------------------------------------------------------------------------------------------------------------------------------------|----------------------------------------------------|--------------------|
| 16 | ≈3000m             |                             | <ul style="list-style-type: none"> <li>The interval training in: consisted of 6 – 8 reps of 2–3 min duration at 100% PPO during the first 4 wk</li> <li>increased to 5 reps of 5– 6 min at 90% of PPO, then 4 reps of 8 min at 90% of PPO in the last week of training</li> <li>IHT: hypoxic training conditions</li> <li>IHIT: performed the warm-up, the cool-down, and the recovery from each interval in hypoxia, high-intensity exercise in normoxia</li> <li></li> </ul> | <ul style="list-style-type: none"> <li>7-wk training program</li> </ul> | <ul style="list-style-type: none"> <li>↑IHT : VO<sub>2</sub>max (L·min<sup>-1</sup>) (8.7 ± 9.1%; <i>P</i> &lt; 0.05)</li> </ul> |                       | <ul style="list-style-type: none"> <li>IHT: No statistic effect in V O<sub>2</sub>max 4.62 ± 0.33 -&gt;5.02 ±0.42, 8% <i>P</i> &gt; .05</li> <li>NOR : V O<sub>2</sub>max 4.47 ± 0.36 -&gt;4.69 ± 0.29 4%</li> </ul> | Thirty-three well-trained cyclists and triathletes | Roels et al., [17] |

|    |                    |       |                                                                                                                                        |                                                                           |                                                                                                               |                                                                                                                                                                                                                                      |                                                                   |                       |
|----|--------------------|-------|----------------------------------------------------------------------------------------------------------------------------------------|---------------------------------------------------------------------------|---------------------------------------------------------------------------------------------------------------|--------------------------------------------------------------------------------------------------------------------------------------------------------------------------------------------------------------------------------------|-------------------------------------------------------------------|-----------------------|
| 17 | ≈2000m             | 12.3% | <ul style="list-style-type: none"> <li>submaximal exercise in normoxia, exposure to hypoxia during a resting state in tent.</li> </ul> | 3h per day for 14 consecutive days                                        | <ul style="list-style-type: none"> <li>↑IHIT 55.8 -&gt; 59.7<br/>7.0%*</li> </ul>                             | HR (beats/min <sup>-1</sup> ) *<br><br><ul style="list-style-type: none"> <li>All hematological no changed through out the experimental period in both groups</li> </ul>                                                             | 15 trained male endurance runners                                 | Katayama et al., [38] |
| 18 | ≈2,000- to 3,100-m | 14.3% | <ul style="list-style-type: none"> <li>(LHTL) compared lived low trained low (LLTL).</li> <li>20 nights of sleeping at</li> </ul>      | 3 WKS /9 times<br><br>simulated altitude while training at 600-m altitude | <ul style="list-style-type: none"> <li>54.7 -&gt; 61.5<br/>↓whole body VO<sub>2</sub></li> </ul>              | <ul style="list-style-type: none"> <li>no effect on Hb<sub>mass</sub></li> <li>↑running economy</li> <li>O<sub>2</sub> (l/min) averaged across the three submaximal running speeds was 3.3% lower (LHTL)</li> </ul>                  | elite distance runners                                            | Saunders et al., [40] |
| 19 | ≈3,000m            | 14.3% | <ul style="list-style-type: none"> <li>LHTL</li> <li>23 nights in simulated moderate altitude (3000 m)</li> </ul>                      |                                                                           | Muscle buffer capacity and metabolites 17.7 ± 4.9%                                                            | <ul style="list-style-type: none"> <li>VO<sub>2peak</sub> fell after LHTL 7%</li> <li>Submaximal VO<sub>2</sub> ↓ and efficiency improved 0.8%</li> <li>improved exercise efficiency is a fundamental adaptation to LHTL.</li> </ul> | 13male athletes ( triathletes, cross-country skiers and cyclists) | Gore et al., [39]     |
| 20 | ≈4,000–5,500 m     |       | Individualized training plans                                                                                                          | 4 WKS                                                                     | <ul style="list-style-type: none"> <li>no effect on VO<sub>2max</sub>, l/min, 3.7±0.6 -&gt;3.8±0.7</li> </ul> | <ul style="list-style-type: none"> <li>no change in economy</li> <li>no differences in submaximal HR, La<sup>-</sup>, VE, or velocity at VO<sub>2max</sub></li> </ul>                                                                | 13swimmers, 10 runners                                            | Truijens et al., [41] |

ANS = Autonomic Nervous System, baPWV = brachial–ankle pulse wave velocity, COi = cardio output, DPA = diameter of the popliteal artery, Epo = erythropoietin, FiO<sub>2</sub> = O<sub>2</sub> fraction, FMD = flow-mediated vasodilation, GH = Growth Hormone, Hb = hemoglobin, Hct = haematocrit value, HIF-1α = Hypoxia-Inducible Factor 1-α, HIIT =high intensity interval training, HGB = hemoglobin concentration, HR=heart rate, HR<sub>max</sub> = maximal heart rate, IGF-1 = Insulin-Like Growth Factor-1, IHT = intermittent hypoxia training, IHIT = intermittent hypoxic interval training, LHTL = live high train low, LLTL = live low train low, mRNA = messenger ribonucleic acid, MS = hemoglobin mass, , NOR = normoxia , O<sub>2</sub> = oxygen, PPO = peak power out-put, RBC = number of erythrocytes, RSA = repeated sprint ability, RSH = number of sprints to exhaustion, SIT = Sprint interval training, TTE = time to Exhaustion, SpO<sub>2</sub> = Peripheral Oxygen Saturation, TNFα = tumor necrosis factor-α, VE = Ventilation, VEGF = vascular endothelial growth factor, VO<sub>2</sub> = oxygen consumption, VO<sub>2peak</sub> = peak oxygen consumption , VO<sub>2LT</sub> = Ventilatory Threshold for Oxygen Uptake, VO<sub>2max</sub> = maximal oxygen consumption, WRLT = threshold workload, WR<sub>max</sub> = Wattage Resistance Maximum, ΔLA= Delta lactate acid, La<sup>-</sup> = capillary lactate concentration
